# Supplementary material for: Different Functional and Structural Characteristics between ApoA-I and ApoA-4 in Lipid-Free and Reconstituted HDL State: ApoA-4 Showed Less Anti-Atherogenic Activity
Source: PubMed Central journal article supplement — Mol Cells. 2015 May 22;38(6):573–9. doi: 10.14348/molcells.2015.0052 (PMC4469915; doi:10.14348/molcells.2015.0052), 2015-05-22
Supplement: molce-38-6-573-supple.pdf [file molce-38-6-573-supple.pdf]

# Suppl. Fig. 1

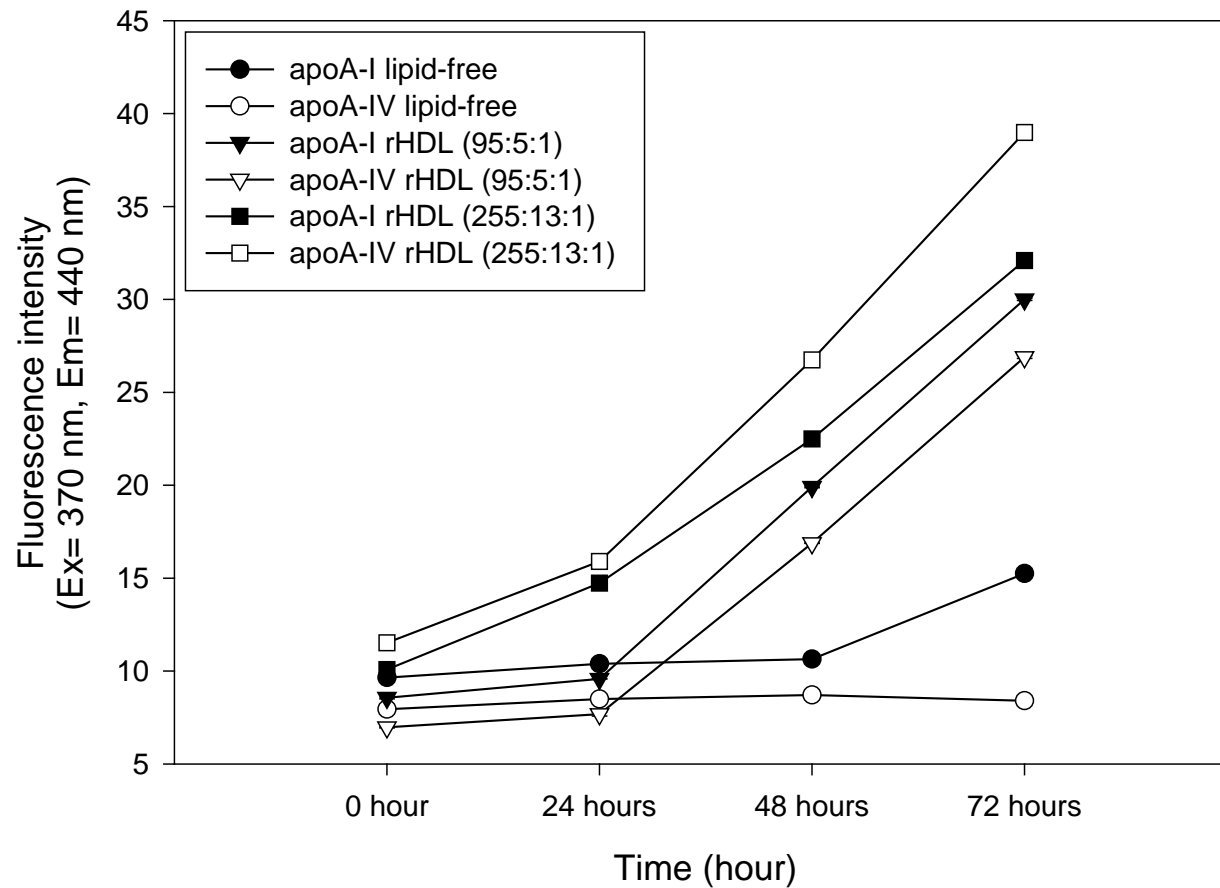

Determination of extent of glycation in a time-dependent manner for 72 hr in lipid-free and lipid bound states.

Fluoroscopic determination (Ex=370 nm, Em=440 nm) with the same amount of protein (1.2 mg/mL) and fructose (final concentration, 5 mM).

**A**

apoA-I rHDL + LDL

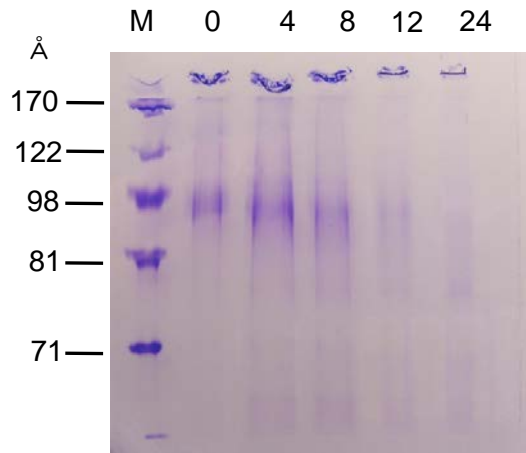

8-25% Native-PAGGE

**B**

apoA-I rHDL + LDL

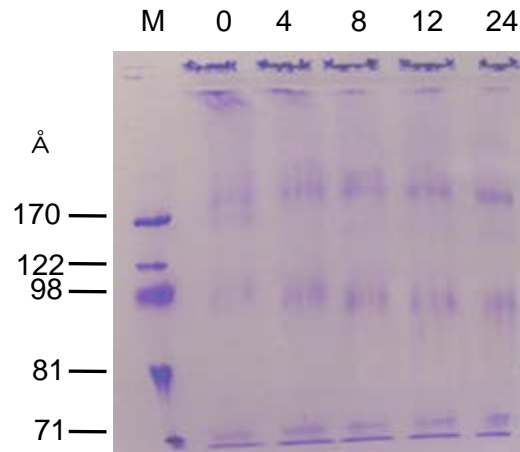

4-15% Native-PAGGE

**Suppl Fig. 2**

Particle size rearrangement patterns of POPC-rHDL in the presence of LDL (8-25% native GGE). The reaction was initiated by adding 100 mg of human LDL (apo-B) to 100 mg of rHDL at 37°C. Aliquots of the incubation mixture were collected at designated time intervals and stored at 4°C until electrophoresis. Lane M, HMW size marker, and incubation time is indicated at top of each lane. Protein bands were visualized by Coomassie Blue staining.

**C**

apoA-IV rHDL + LDL

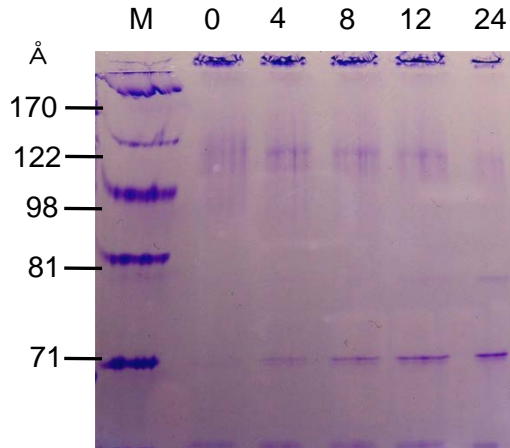

8-25% Native-PAGGE

**D**

apoA-IV rHDL + LDL

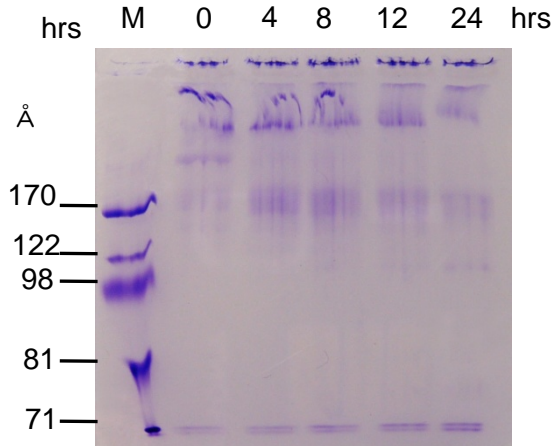

4-15% Native-PAGGE

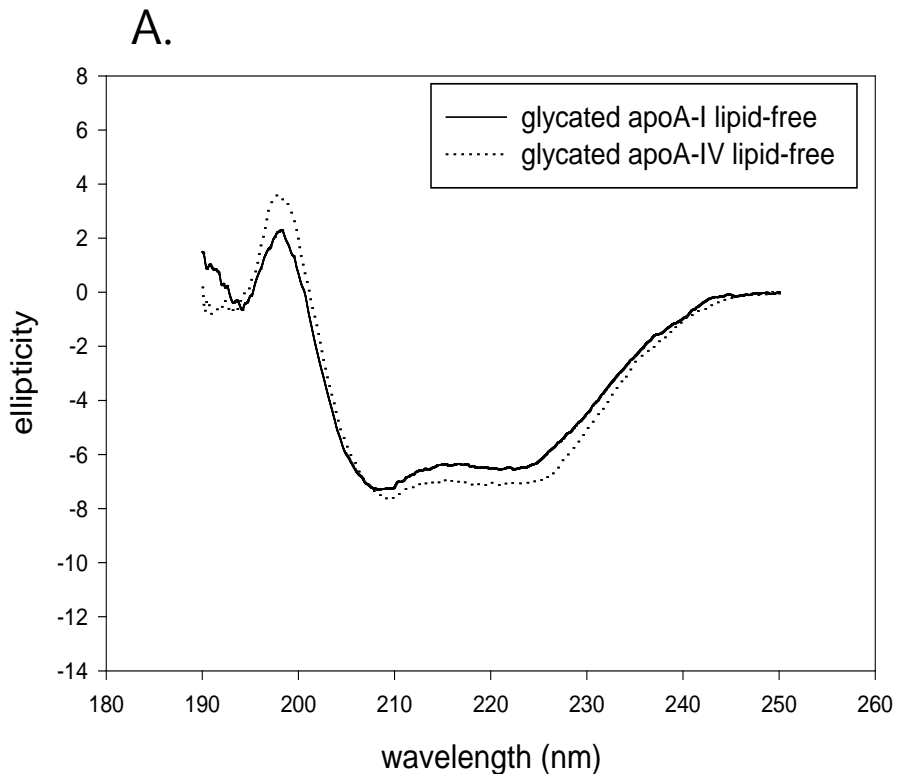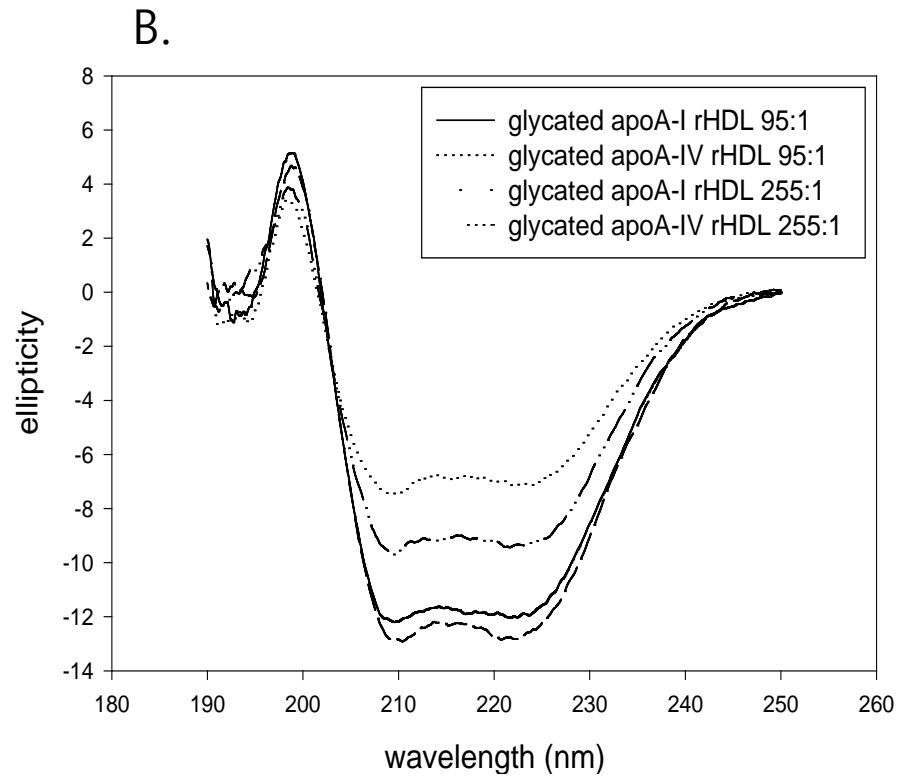

Circular dichroic spectra of apoA-I and apoA-IV under glycosylated state
